# Supplementary material for: Flood warnings in coastal areas: how do social and behavioural patterns influence alert services?
Source: Copernicus journal article supplement (doi:10.5194/nhessd-3-641-2015), 2015-01-21

Figure 1- Location of Cesenatico in the Mediterranean Area

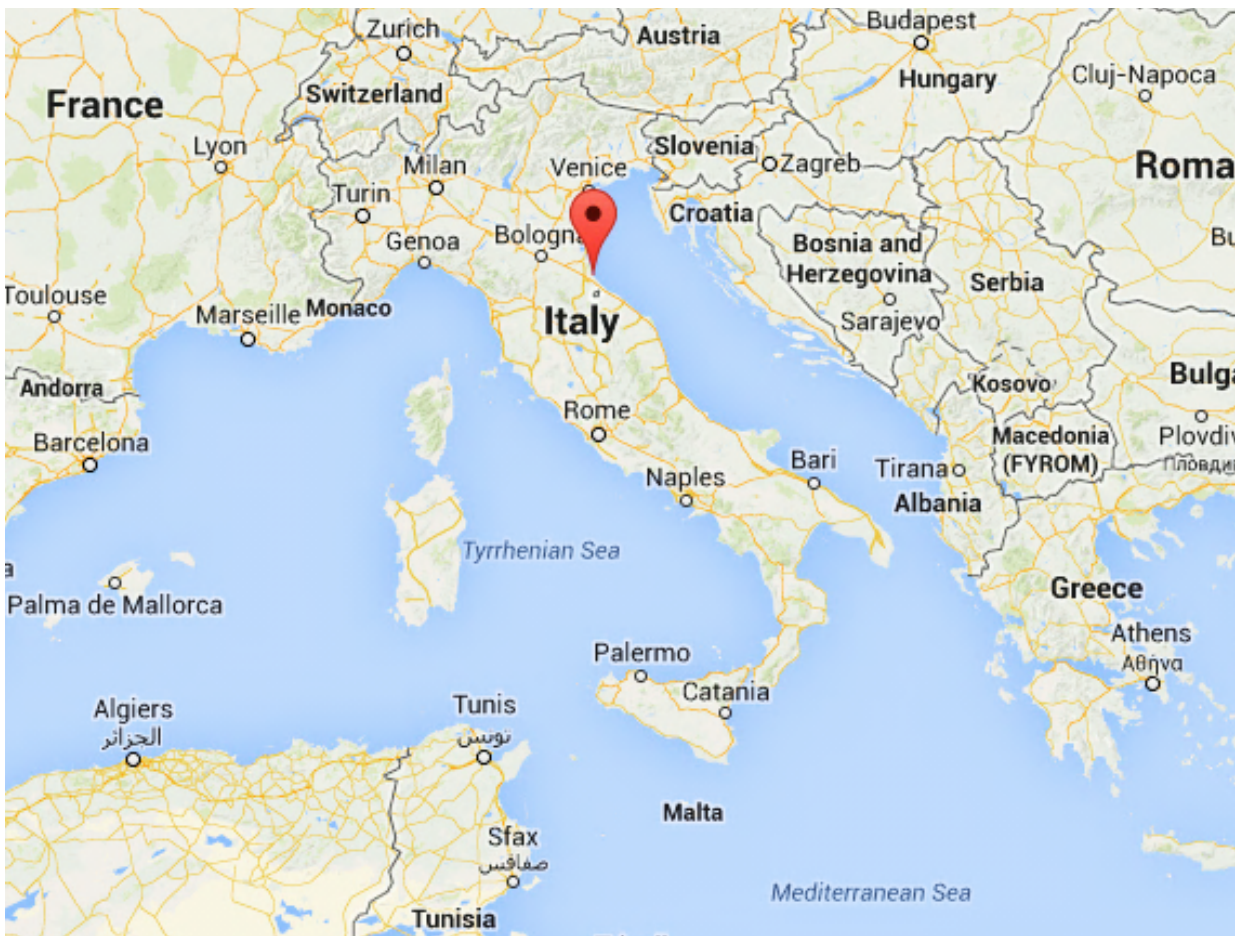

Figure 2. The municipality of Cesenatico, with sources, drivers and pathways. (Source: Theseus Project)

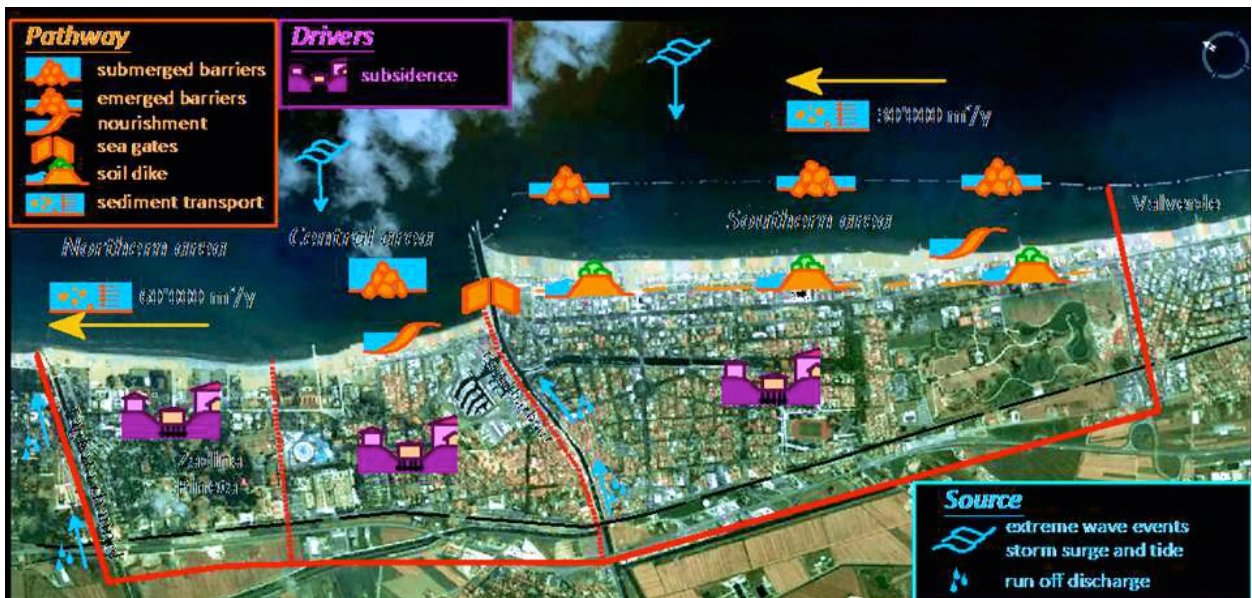

**Figure 3- Visual output of key variables**

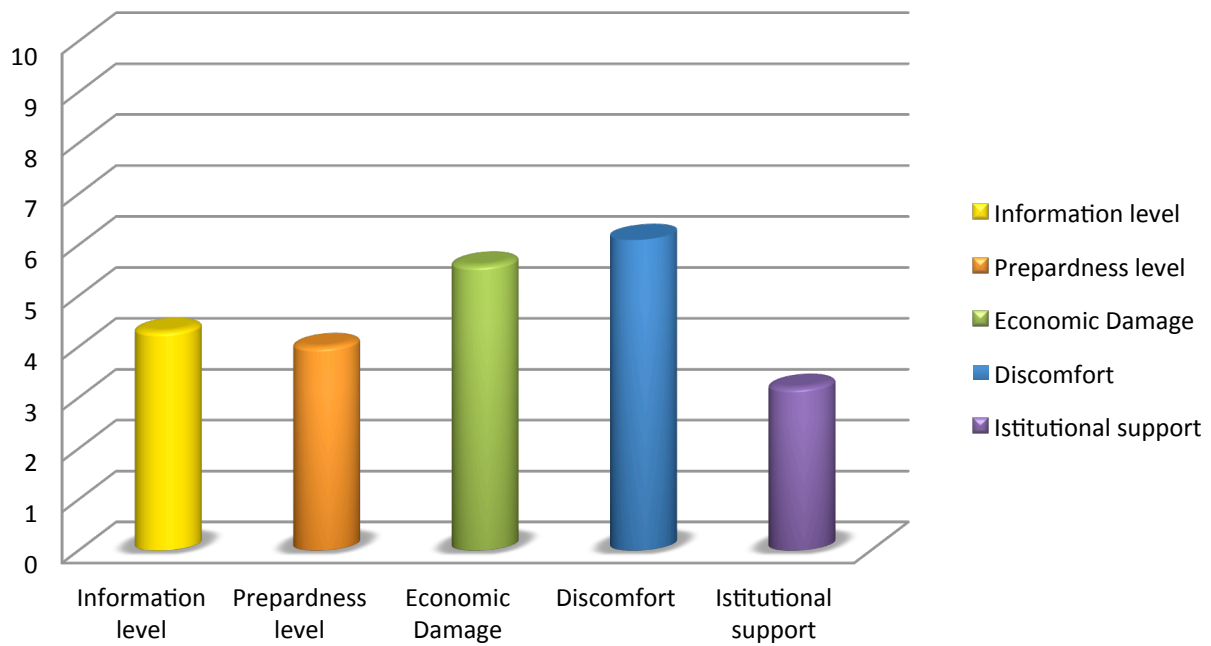

**Figure 4- Reactions to the alert siren**

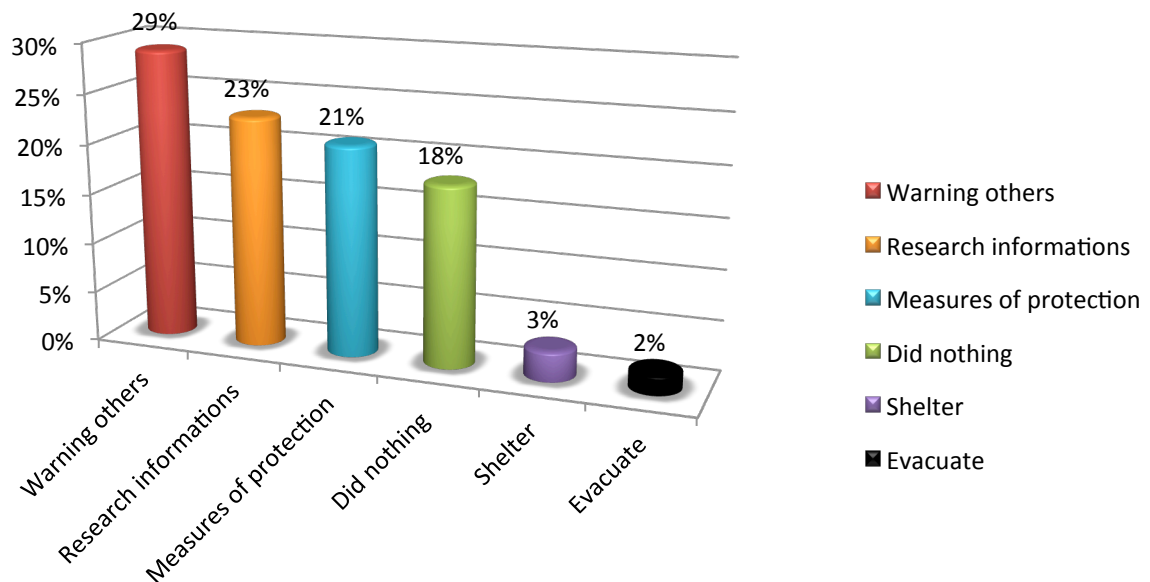

**Figure 5 - Knowledge of the SMS warning service**

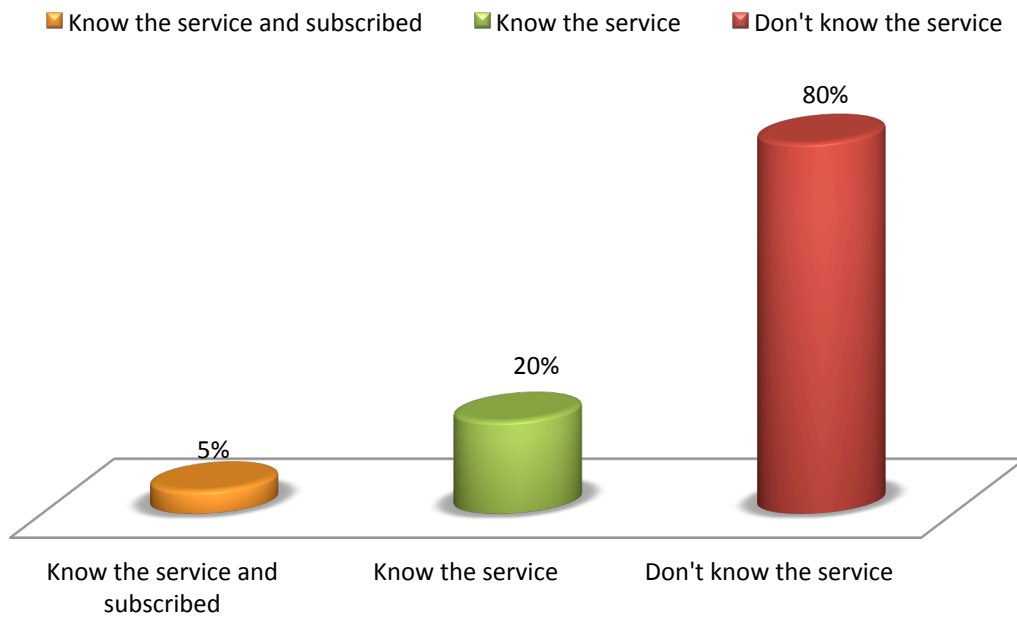

Supplement: Supplementary file 1 [file Figures-Flood Warnings in Coastal Areas How Do Social and Behavioural Patterns Influence Alert Services.pdf › Figures-Flood Warnings in Coastal Areas How Do Social and Behavioural Patterns Influence Alert Services.pdf]
