# Supplementary material for: Flood warnings in coastal areas: how do social and behavioural patterns influence alert services?
Source: Copernicus journal article supplement (doi:10.5194/nhessd-3-641-2015), 2015-01-21
Supplement: Supplementary file 2 [file nhessd-3-641-2015-supplement-cover-letter.pdf › nhessd-3-641-2015-supplement-cover-letter.pdf]

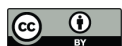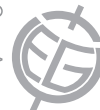

## *Supplement of*

# **Flood warnings in coastal areas: how do social and behavioural patterns influence alert services?**

**G. Pescaroli and M. Magni**

*Correspondence to:* G. Pescaroli (gianluca.pescaroli.14@ucl.ac.uk)

- nhessd-3-641-2015-supplement-cover-letter.pdf
- Figures-Flood Warnings in Coastal Areas How Do Social and Behavioural Patterns Influence Alert Services.pdf
- \_\_MACOSX
  - . \_Figures-Flood Warnings in Coastal Areas How Do Social and Behavioural Patterns Influence Alert Services.pdf
